# Supplementary material for: Ethnic minority status as social determinant for COVID-19 infection, hospitalisation, severity, ICU admission and deaths in the early phase of the pandemic: a meta-analysis
Source: PubMed Central journal article supplement — BMJ Glob Health. 2021 Nov 5;6(11):e007433. doi: 10.1136/bmjgh-2021-007433 (PMC8573300; doi:10.1136/bmjgh-2021-007433), 2021-11-05

## Appendices

|                                                                                                                                                                          |    |
|--------------------------------------------------------------------------------------------------------------------------------------------------------------------------|----|
| <i>Appendix: Search strategy</i>                                                                                                                                         | 2  |
| <i>Appendix Table 1: Study outcomes and definitions</i>                                                                                                                  | 3  |
| <i>Appendix: List of references of included papers</i>                                                                                                                   | 4  |
| <i>Appendix Table 2: Overview of odds ratios adjusted for multiple factors per outcome</i>                                                                               | 6  |
| <i>Appendix Figure 1: Individual studies with unadjusted risk estimates for SARS-CoV-2 infection among the general population in the U.S. by ethnic minority group</i>   | 8  |
| <i>Appendix Figure 2: Individual studies with adjusted risk estimates for SARS-CoV-2 infection among the general population in the U.S. by ethnic minority group</i>     | 9  |
| <i>Appendix Figure 3: Individual studies with unadjusted risk estimates for SARS-CoV-2 infection among the general population in Europe by ethnic minority group</i>     | 10 |
| <i>Appendix Figure 4: Individual studies with adjusted risk estimates for SARS-CoV-2 infection among the general population in Europe by ethnic minority group</i>       | 11 |
| <i>Appendix Figure 5: Individual studies with unadjusted risk estimates for hospitalization among infected individuals in the U.S. by ethnic minority group</i>          | 12 |
| <i>Appendix Figure 6: Individual studies with adjusted risk estimates for hospitalization among infected individuals in the U.S. by ethnic minority group</i>            | 13 |
| <i>Appendix Figure 7: Individual studies with unadjusted risk estimates for severe disease among hospitalized COVID-19 patients in the U.S. by ethnic minority group</i> | 14 |
| <i>Appendix Figure 8: Individual studies with adjusted risk estimates for severe disease among hospitalized COVID-19 patients in the U.S. by ethnic minority group</i>   | 15 |
| <i>Appendix Figure 9: Individual studies with unadjusted risk estimates for ICU admission among hospitalized COVID-19 patients in the U.S. by ethnic minority group</i>  | 16 |
| <i>Appendix Figure 10: Individual studies with adjusted risk estimates for ICU admission among hospitalized COVID-19 patients in the U.S. by ethnic minority group</i>   | 17 |
| <i>Appendix Figure 11: Individual studies with unadjusted risk estimates for death among hospitalized COVID-19 patients in the U.S. by ethnic minority group</i>         | 18 |
| <i>Appendix Figure 12: Individual studies with adjusted risk estimates for death among hospitalized COVID-19 patients in the U.S. by ethnic minority group</i>           | 19 |
| <i>Appendix Figure 13: Individual studies with unadjusted risk estimates for death among hospitalized COVID-19 patients in Europe by ethnic minority group</i>           | 20 |
| <i>Appendix Figure 14: Individual studies with unadjusted risk estimates for death among hospitalized COVID-19 patients in Brazil by ethnic minority group</i>           | 21 |

### Appendix: Search strategy

#### PubMed

("COVID-19"[Supplementary Concept] OR "severe acute respiratory syndrome coronavirus 2"[Supplementary Concept] OR ("Coronavirus"[MeSH Terms] OR "Coronavirus Infections"[Mesh:NoExp] OR pneumonia virus\*[tiab] OR cov[tiab]) AND (outbreak[tiab] OR wuhan[tiab] OR novel[all] OR 19[tiab] OR 2019[tiab] OR epidem\*[tiab] OR epidemy[all] OR epidemic\*[all] OR pandem\*[all] OR new[tiab])) OR coronavirus\*[tiab] OR corona virus\*[tiab] OR ncov[tiab] OR 2019ncov[tiab] OR covid19[tiab] OR "covid 19"[tiab] OR "sars cov 2"[tiab] OR sars2[tiab] OR "ncov 2019"[tiab] OR "sars coronavirus 2"[tiab] OR "sars corona virus 2"[tiab] OR "severe acute respiratory syndrome cov 2"[tiab] OR "severe acute respiratory syndrome cov2"[tiab] OR severe acute respiratory syndrome cov\*[tiab] OR cov2[tiab]) AND ("2019/12"[Date - Entrez] : "3000"[Date - Entrez])

#### Embase Ovid

- 1 exp Coronavirus/
- 2 exp Coronavirus Infections/
- 3 (coronavirus\* or corona virus\* or OC43 or NL63 or 229E or HKU1 or HCoV\* or ncov\* or covid\* or sars-cov\* or sarscov\* or Sars-coronavirus\* or Severe Acute Respiratory Syndrome Coronavirus\*).mp.
- 4 (or/1-3) and 20190101:20301231.(dc). [this set is the sensitive/broad part of the search]
- 5 4 not (SARS or SARS-CoV or MERS or MERS-CoV or Middle East respiratory syndrome or camel\* or dromedar\* or equine or coronary or coronal or covidence\* or covidien or influenza virus or HIV or bovine or calves or TGEV or feline or porcine or BCoV or PED or PEDV or PDCoV or FIPV or FCoV or SADS-CoV or canine or CCov or zoonotic or avian influenza or H1N1 or H5N1 or H5N6 or IBV or murine corona\*).mp. [line 5 removes noise in the search results]
- 6 ((pneumonia or covid\* or coronavirus\* or corona virus\* or ncov\* or 2019-ncov or sars\*).mp. or exp pneumonia/) and Wuhan.mp.
- 7 (coronavirus disease 2019 or 2019-ncov or ncov19 or ncov-19 or 2019-novel CoV or severe acute respiratory syndrome coronavirus 2 or sars-cov2 or sars-cov-2 or sarscov2 or sarscov-2 or Sars-coronavirus2 or Sars-coronavirus-2 or SARS-like coronavirus\* or coronavirus-19 or covid19 or covid-19 or covid 2019 or ((novel or new or nouveau) adj2 (CoV or nCoV or covid or coronavirus\* or corona virus or Pandemi\*2)) or ((covid or covid19 or covid-19) and pandemic\*2) or (coronavirus\* and pneumonia)).mp.
- 8 (coronavirus disease 2019 or severe acute respiratory syndrome coronavirus 2).sh,dj.
- 9 (630575119 OR 630830186 OR 630941329 OR 631043694 OR 631260659 OR 631272428 OR 631272880 OR 631286076 OR 631290163 OR 631308782 OR 631324397 OR 631352500 OR 631416440 OR 631431802 OR 631452886 OR 631456079 OR 631457551 OR 631462438 OR 631462876 OR 631465538 OR 631465685 OR 631469310 OR 2004499662 OR 2004505338 OR 2005280837 OR 2005387675 OR 2005408544 OR 2005484987 OR 2005549151).an. [Articles not captured by this search when created in April 2020, pending further indexing by NLM/Elsevier]
- 10 (or/6-9) and 20191201:20301231.(dc). [Lines 5 to 8 are specific to Covid-19]
- 11 5 or 10

*Appendix Table 1: Study outcomes and definitions*

| <b>Severity stage</b> | <b>Case</b>     | <b>control</b>      | <b>Population</b>           |
|-----------------------|-----------------|---------------------|-----------------------------|
| 1. Infection          | Test positive   | Test negative       | General population          |
| 2. Hospitalization    | Hospitalized    | Not hospitalized    | Confirmed COVID-19 cases    |
| 3. Severe symptoms    | Severe symptoms | Non-severe symptoms | Hospitalised COVID-19 cases |
| 4. ICU admission      | Admitted to ICU | Not admitted to ICU | Hospitalised COVID-19 cases |
| 5. Death              | Death           | Alive               | Hospitalised COVID-19 cases |

*Appendix: List of references of included papers*

1. N. Mehta et al., Association of Use of Angiotensin-Converting Enzyme Inhibitors and Angiotensin II Receptor Blockers With Testing Positive for Coronavirus Disease 2019 (COVID-19). *JAMA Cardiol* 5, 1020-1026 (2020).
2. P. Zachariah et al., Epidemiology, Clinical Features, and Disease Severity in Patients With Coronavirus Disease 2019 (COVID-19) in a Children's Hospital in New York City, New York. *JAMA Pediatr* 174, e202430 (2020).
3. A. Haimovich et al., Patient factors associated with SARS-CoV-2 in an admitted emergency department population. *J Am Coll Emerg Physicians Open* 1, 569-577 (2020).
4. M. van Gerwen et al., Risk factors and outcomes of COVID-19 in New York City; a retrospective cohort study. *J Med Virol* 93, 907-915 (2021).
5. T. Maeda, R. Obata, D. D. Rizk, T. Kuno, The association of interleukin-6 value, interleukin inhibitors, and outcomes of patients with COVID-19 in New York City. *J Med Virol* 93, 463-471 (2021).
6. T. Mikami et al., Risk Factors for Mortality in Patients with COVID-19 in New York City. *J Gen Intern Med* 36, 17-26 (2021).
7. A. J. Singer et al., Cohort of Four Thousand Four Hundred Four Persons Under Investigation for COVID-19 in a New York Hospital and Predictors of ICU Care and Ventilation. *Ann Emerg Med* 76, 394-404 (2020).
8. S. A. McCullough et al., Electrocardiographic Findings in Coronavirus Disease-19: Insights on Mortality and Underlying Myocardial Processes. *J Card Fail* 26, 626-632 (2020).
9. C. C. Price et al., Tocilizumab Treatment for Cytokine Release Syndrome in Hospitalized Patients With Coronavirus Disease 2019: Survival and Clinical Outcomes. *Chest* 158, 1397-1408 (2020).
10. L. Golestaneh et al., The association of race and COVID-19 mortality. *EClinicalMedicine* 25, 100455 (2020).
11. L. Palaodimos et al., Severe obesity, increasing age and male sex are independently associated with worse in-hospital outcomes, and higher in-hospital mortality, in a cohort of patients with COVID-19 in the Bronx, New York. *Metabolism* 108, 154262 (2020).
12. N. Musoke et al., Anticoagulation and bleeding risk in patients with COVID-19. *Thromb Res* 196, 227-230 (2020).
13. E. G. Price-Haywood, J. Burton, D. Fort, L. Seoane, Hospitalization and Mortality among Black Patients and White Patients with Covid-19. *N Engl J Med* 382, 2534-2543 (2020).
14. L. Kim et al., Risk Factors for Intensive Care Unit Admission and In-hospital Mortality among Hospitalized Adults Identified through the U.S. Coronavirus Disease 2019 (COVID-19)-Associated Hospitalization Surveillance Network (COVID-NET). *Clin Infect Dis*, (2020).
15. G. Chamie et al., SARS-CoV-2 Community Transmission disproportionately affects Latinx population during Shelter-in-Place in San Francisco. *Clin Infect Dis*, (2020).
16. T. R. McCarty et al., How Do Presenting Symptoms and Outcomes Differ by Race/Ethnicity Among Hospitalized Patients with COVID-19 Infection? Experience in Massachusetts. *Clin Infect Dis*, (2020).
17. A. Bhargava et al., Predictors for Severe COVID-19 Infection. *Clin Infect Dis* 71, 1962-1968 (2020).
18. E. Peterson et al., The relationship between coronary artery disease and clinical outcomes in COVID-19: a single-center retrospective analysis. *Coron Artery Dis*, (2020).
19. S. J. Shah et al., Clinical features, diagnostics, and outcomes of patients presenting with acute respiratory illness: A retrospective cohort study of patients with and without COVID-19. *EClinicalMedicine* 27, 100518 (2020).
20. R. Kalyanaraman Marcello et al., Characteristics and outcomes of COVID-19 patients in New York City's public hospital system. *PLoS One* 15, e0243027 (2020).
21. T. Gu et al., Characteristics Associated With Racial/Ethnic Disparities in COVID-19 Outcomes in an Academic Health Care System. *JAMA Netw Open* 3, e2025197 (2020).
22. A. Mendy, S. Apewokin, A. A. Wells, A. L. Morrow, Factors Associated with Hospitalization and Disease Severity in a Racially and Ethnically Diverse Population of COVID-19 Patients. *medRxiv*, (2020).
23. T. S. Chang et al., Pre-existing conditions in Hispanics/Latinxs that are COVID-19 risk factors. *iScience* 24, 102188 (2021).
24. S. Dublin et al., Renin-angiotensin-aldosterone system inhibitors and COVID-19 infection or hospitalization: a cohort study. *Am J Hypertens*, (2020).
25. J. McPadden et al., Clinical characteristics and outcomes for 7,995 patients with SARS-CoV-2 infection. *PLoS One* 16, e0243291 (2021).
26. A. B. Crouse et al., Metformin Use Is Associated With Reduced Mortality in a Diverse Population With COVID-19 and Diabetes. *Front Endocrinol (Lausanne)* 11, 600439 (2020).
27. A. C. Monteiro et al., Obesity and smoking as risk factors for invasive mechanical ventilation in COVID-19: A retrospective, observational cohort study. *PLoS One* 15, e0238552 (2020).
28. N. E. Ingraham et al., Racial/Ethnic Disparities in Hospital Admissions from COVID-19 and Determining the Impact of Neighborhood Deprivation and Primary Language. *medRxiv*, (2020).
29. M. Gottlieb, S. Sansom, C. Frankenberger, E. Ward, B. Hota, Clinical Course and Factors Associated With Hospitalization and Critical Illness Among COVID-19 Patients in Chicago, Illinois. *Acad Emerg Med* 27, 963-973 (2020).
30. C. M. Petrilli et al., Factors associated with hospital admission and critical illness among 5279 people with coronavirus disease 2019 in New York City: prospective cohort study. *Bmj* 369, m1966 (2020).

31. M. G. Argenziano et al., Characterization and clinical course of 1000 patients with coronavirus disease 2019 in New York: retrospective case series. *Bmj* 369, m1996 (2020).
32. G. McGuinness et al., Increased Incidence of Barotrauma in Patients with COVID-19 on Invasive Mechanical Ventilation. *Radiology* 297, E252-e262 (2020).
33. Y. Rozenfeld et al., A model of disparities: risk factors associated with COVID-19 infection. *Int J Equity Health* 19, 126 (2020).
34. S. L. Harrison, E. Fazio-Eynullayeva, D. A. Lane, P. Underhill, G. Y. H. Lip, Comorbidities associated with mortality in 31,461 adults with COVID-19 in the United States: A federated electronic medical record analysis. *PLoS Med* 17, e1003321 (2020).
35. A. Adegunsoye, I. B. Ventura, V. M. Liarski, Association of black race with outcomes in COVID-19 disease: a retrospective cohort study. *Annals of the American Thoracic Society* 17, 1336-1339 (2020).
36. J. A. W. Gold et al., Characteristics and Clinical Outcomes of Adult Patients Hospitalized with COVID-19 - Georgia, March 2020. *MMWR Morb Mortal Wkly Rep* 69, 545-550 (2020).
37. M. E. Killerby et al., Characteristics Associated with Hospitalization Among Patients with COVID-19 - Metropolitan Atlanta, Georgia, March-April 2020. *MMWR Morb Mortal Wkly Rep* 69, 790-794 (2020).
38. M. W. Tenforde et al., Characteristics of Adult Outpatients and Inpatients with COVID-19 - 11 Academic Medical Centers, United States, March-May 2020. *MMWR Morb Mortal Wkly Rep* 69, 841-846 (2020).
39. V. R. Mani, A. Kalabin, S. C. Valdivieso, M. Murray-Ramcharan, B. Donaldson, New York Inner City Hospital COVID-19 Experience and Current Data: Retrospective Analysis at the Epicenter of the American Coronavirus Outbreak. *J Med Internet Res* 22, e20548 (2020).
40. S. Chilimuri et al., Predictors of Mortality in Adults Admitted with COVID-19: Retrospective Cohort Study from New York City. *West J Emerg Med* 21, 779-784 (2020).
41. W. Gavin et al., Clinical characteristics, outcomes and prognosticators in adult patients hospitalized with COVID-19. *Am J Infect Control* 49, 158-165 (2021).
42. P. Baqui, I. Bica, V. Marra, A. Ercole, M. van der Schaar, Ethnic and regional variations in hospital mortality from COVID-19 in Brazil: a cross-sectional observational study. *Lancet Glob Health* 8, e1018-e1026 (2020).
43. R. d. C. M. Soares, L. R. Mattos, L. M. Raposo, Risk factors for hospitalization and mortality due to COVID-19 in Espírito Santo State, Brazil. *The American journal of tropical medicine and hygiene* 103, 1184-1190 (2020).
44. F. Ciceri et al., Early predictors of clinical outcomes of COVID-19 outbreak in Milan, Italy. *Clin Immunol* 217, 108509 (2020).
45. J. Berenguer et al., Characteristics and predictors of death among 4035 consecutively hospitalized patients with COVID-19 in Spain. *Clin Microbiol Infect* 26, 1525-1536 (2020).
46. F. Martos Pérez et al., Comorbidity and prognostic factors on admission in a COVID-19 cohort of a general hospital. *Rev Clin Esp*, (2020).
47. C. Lassale, B. Gaye, M. Hamer, C. R. Gale, G. D. Batty, Ethnic disparities in hospitalisation for COVID-19 in England: The role of socioeconomic factors, mental health, and inflammatory and pro-inflammatory factors in a community-based cohort study. *Brain Behav Immun* 88, 44-49 (2020).
48. C. A. Martin et al., Socio-demographic heterogeneity in the prevalence of COVID-19 during lockdown is associated with ethnicity and household size: Results from an observational cohort study. *EClinicalMedicine* 25, 100466 (2020).
49. S. de Lusignan et al., Risk factors for SARS-CoV-2 among patients in the Oxford Royal College of General Practitioners Research and Surveillance Centre primary care network: a cross-sectional study. *Lancet Infect Dis* 20, 1034-1042 (2020).
50. P. N. Perez-Guzman et al., Clinical characteristics and predictors of outcomes of hospitalized patients with COVID-19 in a multi-ethnic London NHS Trust: a retrospective cohort study. *Clin Infect Dis*, (2020).
51. E. Sapey et al., Ethnicity and risk of death in patients hospitalised for COVID-19 infection in the UK: an observational cohort study in an urban catchment area. *BMJ Open Respir Res* 7, (2020).
52. J. Hippisley-Cox et al., Risk of severe COVID-19 disease with ACE inhibitors and angiotensin receptor blockers: cohort study including 8.3 million people. *Heart* 106, 1503-1511 (2020).
53. C. L. Niedzwiedz et al., Ethnic and socioeconomic differences in SARS-CoV-2 infection: prospective cohort study using UK Biobank. *BMC Med* 18, 160 (2020).
54. S. E. Brill et al., COVID-19: a retrospective cohort study with focus on the over-80s and hospital-onset disease. *BMC Med* 18, 194 (2020).
55. R. W. Aldridge et al., Black, Asian and Minority Ethnic groups in England are at increased risk of death from COVID-19: indirect standardisation of NHS mortality data. *Wellcome Open Res* 5, 88 (2020).
56. R. W. Corbett et al., Epidemiology of COVID-19 in an Urban Dialysis Center. *J Am Soc Nephrol* 31, 1815-1823 (2020).
57. Y. Sun et al., Epidemiological and Clinical Predictors of COVID-19. *Clin Infect Dis* 71, 786-792 (2020).
58. J. Bruminhent, N. Ruangsubvilai, J. Nabhindhakara, A. Ingsathit, S. Kiertiburanakul, Clinical characteristics and risk factors for coronavirus disease 2019 (COVID-19) among patients under investigation in Thailand. *PLoS One* 15, e0239250 (2020).

Appendix Table 2: Overview of odds ratios adjusted for multiple factors per outcome

| Author               | Outcome         | Country             | Group 1            | Group 2                       | Group 3            | Group 4                   | Group 5                          | Group 6 | Group 7         | Group 8 | OR group 1 | OR group 2          | OR group 3          | OR group 4          | OR group 5          | OR group 6          | OR group 7          | OR group 8          | Adjustment factors                                                                                                                                                                                                                                                                                                                     |
|----------------------|-----------------|---------------------|--------------------|-------------------------------|--------------------|---------------------------|----------------------------------|---------|-----------------|---------|------------|---------------------|---------------------|---------------------|---------------------|---------------------|---------------------|---------------------|----------------------------------------------------------------------------------------------------------------------------------------------------------------------------------------------------------------------------------------------------------------------------------------------------------------------------------------|
| Adegunsoye, A.       | Infection       | United States (NA)  | Non-black          | Black                         |                    |                           |                                  |         |                 |         | Ref.       | 3.30 (2.75-3.97)    |                     |                     |                     |                     |                     |                     | Age, sex, zip code                                                                                                                                                                                                                                                                                                                     |
| Dublin, S.           | Infection       | United States (NA)  | Non Hispanic White | Non Hispanic Black            | Non Hispanic Asian | Non Hispanic Mixed/Other  | Hispanic                         |         |                 |         | Ref.       | 4.03 (3.19-5.11)    | 2.23 (1.71-2.90)    | 0.90 (0.58-1.40)    | 2.67 (2.05-3.47)    |                     |                     |                     | Age, sex, comorbidities, BMI, smoking status, medications                                                                                                                                                                                                                                                                              |
| Gu, T.               | Infection       | United States (NA)  | White              | Black                         | Other              | Unknown                   |                                  |         |                 |         | Ref.       | 3.56 (2.90-4.37)    | 1.57 (1.19-2.06)    | 0.78 (0.51-1.20)    |                     |                     |                     |                     | Age, sex, comorbidities, neighborhood SES                                                                                                                                                                                                                                                                                              |
| Martin, C. A.        | Infection       | United Kingdom (EU) | White Caucasian    | South Asian                   | Black              |                           |                                  |         |                 |         | Ref.       | 2.44 (2.01-2.97)    | 2.56 (1.71-3.84)    |                     |                     |                     |                     |                     | Age, sex, EWS at presentation, decile of IMD, estimated household size and comorbidities                                                                                                                                                                                                                                               |
| Niedzwiedz, C. L.    | Infection       | United Kingdom (EU) | White British      | White Irish                   | White Other        | Mixed                     | South Asian                      | Black   | Chinese         | Other   | Ref.       | 1.132 (0.851-1.507) | 1.020 (0.718-1.449) | 0.896 (0.479-1.675) | 1.279 (0.908-1.802) | 1.289 (0.978-1.699) | 2.373 (1.326-4.246) | 1.119 (0.735-1.702) | Age, sex, assessment centre, country of birth, education level, household size, socioeconomic deprivation, housing tenure, urbanicity, employment status, manual occupation, healthcare worker, longstanding illness/disability, number of chronic conditions, self-rated health, body mass index, smoking status, alcohol consumption |
| De Lusignan, S.      | Infection       | United Kingdom (EU) | White              | Asian                         | Black              | Mixed, other              |                                  |         |                 |         | Ref.       | 1.46 (0.94-2.29)    | 4.75 (2.65-8.51)    | 1.71 (0.97-3.01)    |                     |                     |                     |                     | Age, sex, socioeconomic deprivation level, household size, rural/urban, smoking status, BMI, comorbidities                                                                                                                                                                                                                             |
| Rozenfeld, Y.        | Infection       | United States (NA)  | White              | American Indian/Alaska Native | Asian              | Black/African American    | Native Hawaiian/Pacific Islander | Unknown |                 |         | Ref.       | 0.63 (0.36-1.12)    | 1.43 (1.18-1.72)    | 1.51 (1.25-1.83)    | 1.02 (0.66-1.57)    | 1.34 (1.18-1.52)    |                     |                     | Age, sex, region, education, religion, marital status, language, BMI, comorbidities, primary care type, symptoms                                                                                                                                                                                                                       |
| Adegunsoye, A.       | Hospitalization | United States (NA)  | Non-black          | Black                         |                    |                           |                                  |         |                 |         | Ref.       | 3.77 (2.38-5.99)    |                     |                     |                     |                     |                     |                     | Age, sex, zip code                                                                                                                                                                                                                                                                                                                     |
| Dublin, S.           | Hospitalization | United States (NA)  | Non Hispanic White | Non Hispanic Black            | Non Hispanic Asian | Non Hispanic Mixed/Other  | Hispanic                         |         |                 |         | Ref.       | 1.20 (0.68-2.12)    | 0.94 (0.54-1.63)    | 0.42 (0.11-1.62)    | 1.07 (0.49-2.36)    |                     |                     |                     | Age, sex, comorbidities, BMI, smoking status, medications                                                                                                                                                                                                                                                                              |
| Gu, T.               | Hospitalization | United States (NA)  | White              | Black                         | Other              | Unknown                   |                                  |         |                 |         | Ref.       | 1.72 (1.15-2.58)    | 1.42 (0.79-2.54)    | 0.72 (0.28-1.84)    |                     |                     |                     |                     | Age, sex, comorbidities, neighborhood SES                                                                                                                                                                                                                                                                                              |
| Ingraham, N. E.      | Hospitalization | United States (NA)  | White              | Black                         | Asian              | Hispanic                  | Declined                         | Other   |                 |         | Ref.       | 1.50 (1.15-1.94)    | 2.39 (1.74-3.29)    | 3.80 (2.72-5.30)    | 1.82 (1.16-2.87)    | 2.04 (1.04-4.00)    |                     |                     | Age, sex, comorbidities, area deprivation, rural/urban, marital status, English speaking                                                                                                                                                                                                                                               |
| Killerby, M. E.      | Hospitalization | United States (NA)  | White              | Black                         | Other              | Missing                   |                                  |         |                 |         | Ref.       | 3.2 (1.8-5.8)       | Not reported        | Not reported        |                     |                     |                     |                     | Age, sex, obesity, smoking status, insurance status, comorbidities                                                                                                                                                                                                                                                                     |
| McPadden, J.         | Hospitalization | United States (NA)  | Unknown            | Asian                         | Black              | Hawaiian/Pacific Islander | Hispanic                         | White   | American Indian |         | Ref.       | 1.58 (1.02-2.41)    | 1.43 (1.14-1.78)    | 1.45 (0.53-3.52)    | 1.81 (1.50-2.18)    | 0.85 (0.70-1.03)    | 0.44 (0.02-2.68)    |                     | Age, sex, comorbidities                                                                                                                                                                                                                                                                                                                |
| Petrilli, C. M.      | Hospitalization | United States (NA)  | Non-Hispanic white | Non-Hispanic African-American | Asian              | Hispanic                  | Other/multiracial                | Unknown |                 |         | Ref.       | 0.81 (0.65-1.01)    | 1.29 (0.97-1.72)    | 1.63 (1.35-1.97)    | 1.6 (1.21-2.11)     | 0.89 (0.65-1.23)    |                     |                     | Age, sex, smoking status, BMI, comorbidities, week of admission                                                                                                                                                                                                                                                                        |
| Price-Haywood, E. G. | Hospitalization | United States (NA)  | White Non-Hispanic | Black Non-Hispanic            |                    |                           |                                  |         |                 |         | Ref.       | 1.96 (1.62-2.37)    |                     |                     |                     |                     |                     |                     | Fully adjusted models are adjusted for: age, sex, charlson comorb index, residence in low income area, obesity (and insurance in case of the hospitalization model)                                                                                                                                                                    |
| Van Gerwen, M.       | Hospitalization | United States (NA)  | Non-Hispanic White | Non-Hispanic Black            | Other              | Unknown                   |                                  |         |                 |         | Ref.       | 1.08 (0.86-1.35)    | 1.51 (1.24-1.85)    | 0.89 (0.61-1.29)    |                     |                     |                     |                     | Age, sex, BMI, smoking status, and comorbidities                                                                                                                                                                                                                                                                                       |
| Mendy, A.            | Hospitalization | United States (NA)  | Non-Hispanic White | Non-Hispanic Black            | Hispanics          | Other                     |                                  |         |                 |         | Ref.       | 2.23 (1.41-3.53)    | 1.91 (1.11-3.29)    | 0.59 (0.29-1.18)    |                     |                     |                     |                     | Age, sex, smoking status                                                                                                                                                                                                                                                                                                               |
| McCarty, T. R.       | Severe disease  | United States (NA)  | White              | Black                         | Latinx             |                           |                                  |         |                 |         | Ref.       | 0.89 (0.45-1.79)    | 1.34 (0.79-2.28)    |                     |                     |                     |                     |                     | Age, sex, obesity, comorbidities                                                                                                                                                                                                                                                                                                       |

|                       |                |                    |                    |                        |           |                    |         |  |  |  |      |                     |                     |                   |                   |  |  |  |  |                                                                                                                                         |
|-----------------------|----------------|--------------------|--------------------|------------------------|-----------|--------------------|---------|--|--|--|------|---------------------|---------------------|-------------------|-------------------|--|--|--|--|-----------------------------------------------------------------------------------------------------------------------------------------|
| Van Gerwen, M.        | Severe disease | United States (NA) | Non-Hispanic White | Non-Hispanic Black     | Other     | Unknown            |         |  |  |  | Ref. | 1.31 (0.97-1.77)    | 1.52 (1.16-1.98)    | 1.53 (0.92-2.55)  |                   |  |  |  |  | Age, sex, BMI, smoking status, and comorbidities                                                                                        |
| Mendy, A.             | Severe disease | United States (NA) | Non-Hispanic White | Non-Hispanic Black     | Hispanics | Other              |         |  |  |  | Ref. | 3.15 (1.71-5.79)    | 2.78 (1.29-5.96)    | Not estimated     |                   |  |  |  |  | Age, sex, smoking status                                                                                                                |
| Costa Monteiro, A. C. | ICU admission  | United States (NA) | White              | Latinx                 | Asian     | Black              | Other   |  |  |  | Ref. | 2.63 (0.63-11.03)   | 5.44 (0.62-47.71)   | 5.19 (0.81-33.44) | 2.98 (0.46-19.26) |  |  |  |  | Age, sex, smoking status, comorbidities                                                                                                 |
| Gu, T.                | ICU admission  | United States (NA) | White              | Black                  | Other     | Unknown            |         |  |  |  | Ref. | 1.15 (0.73-1.82)    | 0.86 (0.42-1.78)    | 0.60 (0.18-2.04)  |                   |  |  |  |  | Age, sex, comorbidities, neighborhood SES                                                                                               |
| Kim, L.               | ICU admission  | United States (NA) | Non-Hispanic White | Non-Hispanic Black     | Hispanic  | Non-Hispanic Other | Unknown |  |  |  | Ref. | 1.01 (0.89-1.15)    | 0.96 (0.76-1.21)    | 1.06 (0.83-1.37)  | 0.93 (0.74-1.15)  |  |  |  |  | Age, sex, smoking status, obesity, comorbidities                                                                                        |
| McCarty, T. R.        | ICU admission  | United States (NA) | White              | Black                  | Latinx    |                    |         |  |  |  | Ref. | 0.77 (0.39-1.53)    | 1.50 (0.89-2.52)    |                   |                   |  |  |  |  | Age, sex, obesity, comorbidities                                                                                                        |
| Adegunsoye, A.        | Death          | United States (NA) | Non-Black          | Black                  |           |                    |         |  |  |  | Ref. | 0.68 (0.14-3.18)    |                     |                   |                   |  |  |  |  | Age, sex, zip code                                                                                                                      |
| Golestaneh, L.        | Death          | United States (NA) | Non-Hispanic White | Non-Hispanic Black     | Hispanic  | Other              |         |  |  |  | Ref. | 1.2 (0.7-2.0)       | 1.0 (0.6-1.7)       | 1.3 (0.7-2.2)     |                   |  |  |  |  | Age, sex, comorbidities, smoking, obesity, SES, household size, % black residents, >60% residents using public transportation regularly |
| Kim, L.               | Death          | United States (NA) | Non-Hispanic White | Non-Hispanic Black     | Hispanic  | Non-Hispanic Other | Unknown |  |  |  | Ref. | 1.07 (0.85-1.35)    | 1.17 (0.91-1.51)    | 1.26 (0.86-1.82)  | 1.30 (0.74-2.31)  |  |  |  |  | Age, sex, smoking status, obesity, comorbidities                                                                                        |
| McCarty, T. R.        | Death          | United States (NA) | White              | Black                  | Latinx    |                    |         |  |  |  | Ref. | 0.39 (0.13-1.12)    | 0.55 (0.23-1.29)    |                   |                   |  |  |  |  | Age, sex, obesity, comorbidities                                                                                                        |
| McPadden, J.          | Death          | United States (NA) | Unknown            | Black/African-American | Hispanic  | White              | Asian   |  |  |  | Ref. | 1.22 (0.64-2.36)    | 1.34 (0.75-2.37)    | 1.18 (0.65-2.14)  | 1.76 (0.54-5.18)  |  |  |  |  | Age, sex, comorbidities                                                                                                                 |
| Mikami, T.            | Death          | United States (NA) | White              | African American       | Asian     | Others             |         |  |  |  | Ref. | 0.78 (0.65-0.95)    | 0.94 (0.83-1.08)    | 1.00 (0.83-1.19)  |                   |  |  |  |  | Age, sex, smoking status, comorbidities, clinical parameters (e.g. resp. rate, eGFR, labs)                                              |
| Musoke, N.            | Death          | United States (NA) | African American   | Caucasian              | Hispanic  | Other              |         |  |  |  | Ref. | 1.20 (0.38-3.77)    | 0.75 (0.22-2.52)    | 1.31 (0.52-3.32)  |                   |  |  |  |  | Age, sex, BMI, comorbidities, therapeutic anticoagulation                                                                               |
| Peterson, E.          | Death          | United States (NA) | African American   | Caucasian              | Others    |                    |         |  |  |  | Ref. | 1.157 (0.385-3.482) | 0.992 (0.492-1.997) |                   |                   |  |  |  |  | Age, sex, BMI, comorbidities                                                                                                            |
| Price-Haywood, E. G.  | Death          | United States (NA) | White Non-Hispanic | Black Non-Hispanic     |           |                    |         |  |  |  | Ref. | 1.14 (0.88-1.49)    |                     |                   |                   |  |  |  |  | Age, sex, charlson comorb index, residence in low income area, obesity                                                                  |
| Van Gerwen, M.        | Death          | United States (NA) | Non-Hispanic White | Non-Hispanic Black     | Other     | Unknown            |         |  |  |  | Ref. | 0.96 (0.72-1.28)    | 0.98 (0.76-1.27)    | 1.00 (0.56-1.66)  |                   |  |  |  |  | Age, sex, BMI, smoking status, and comorbidities                                                                                        |

Appendix Figure 1: Individual studies with unadjusted risk estimates for SARS-CoV-2 infection among the general population in the U.S. by ethnic minority group

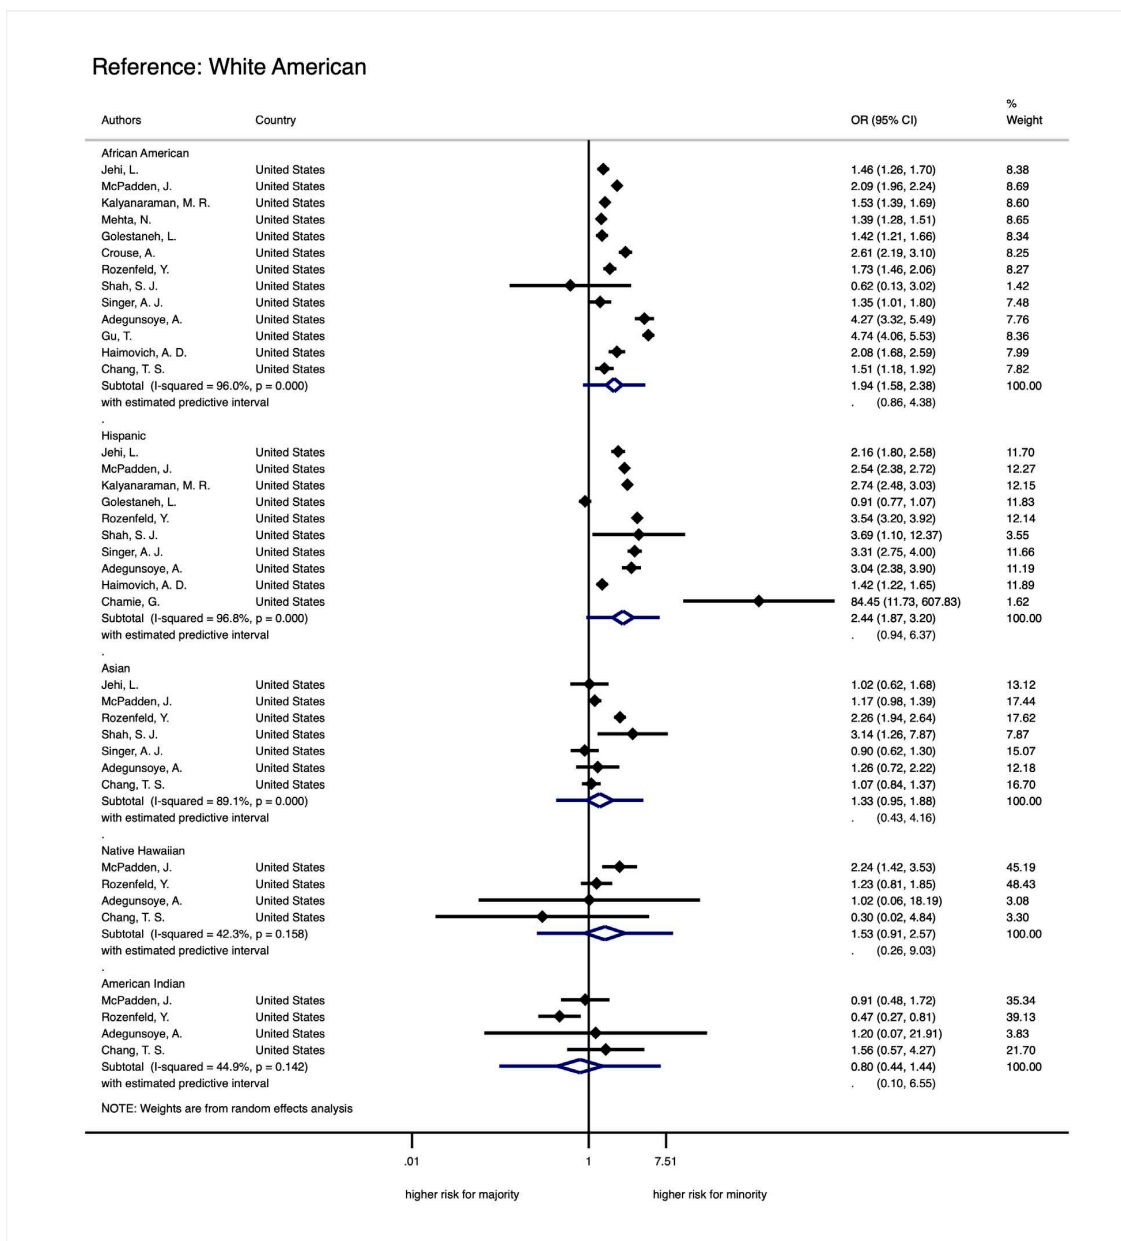



Appendix Figure 2: Individual studies with adjusted risk estimates for SARS-CoV-2 infection among the general population in the U.S. by ethnic minority group

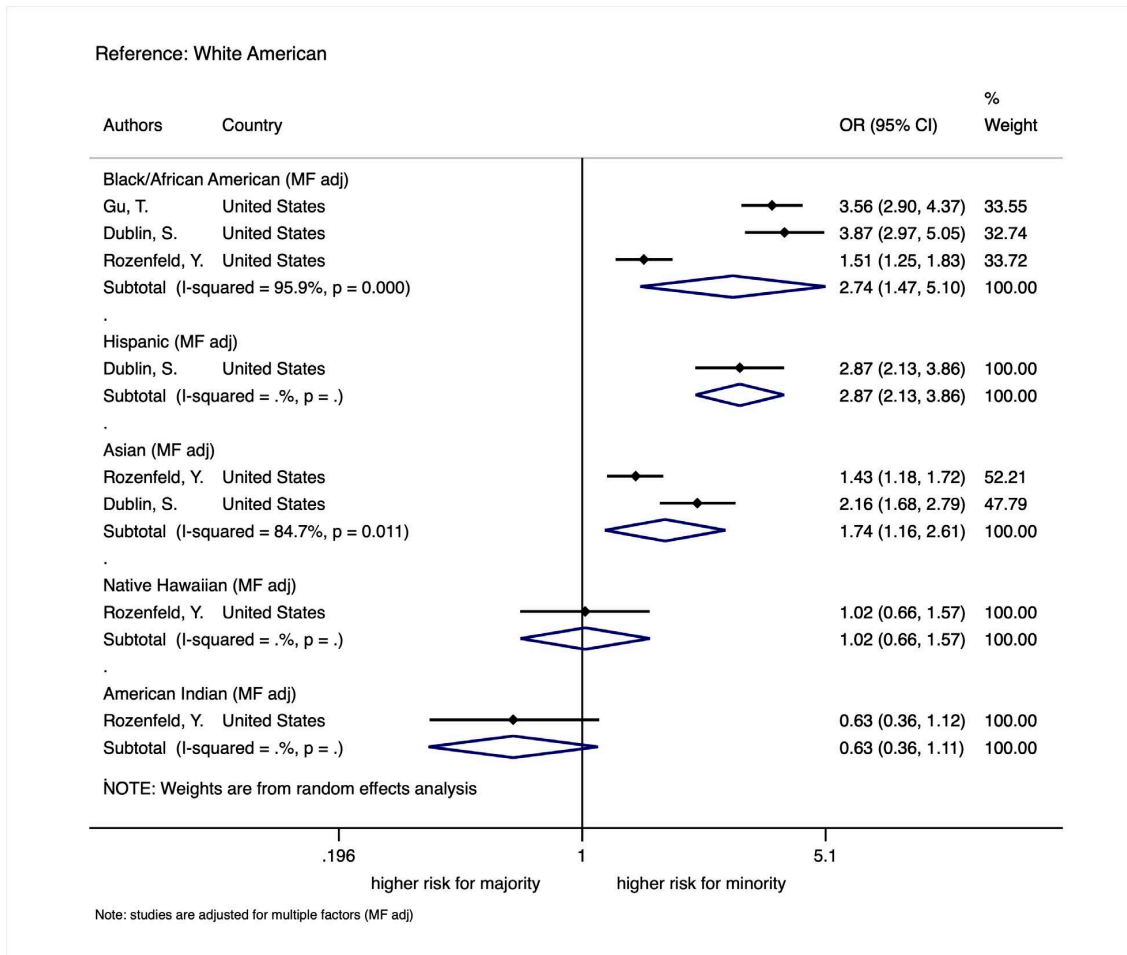

Appendix Figure 3: Individual studies with unadjusted risk estimates for SARS-CoV-2 infection among the general population in Europe by ethnic minority group

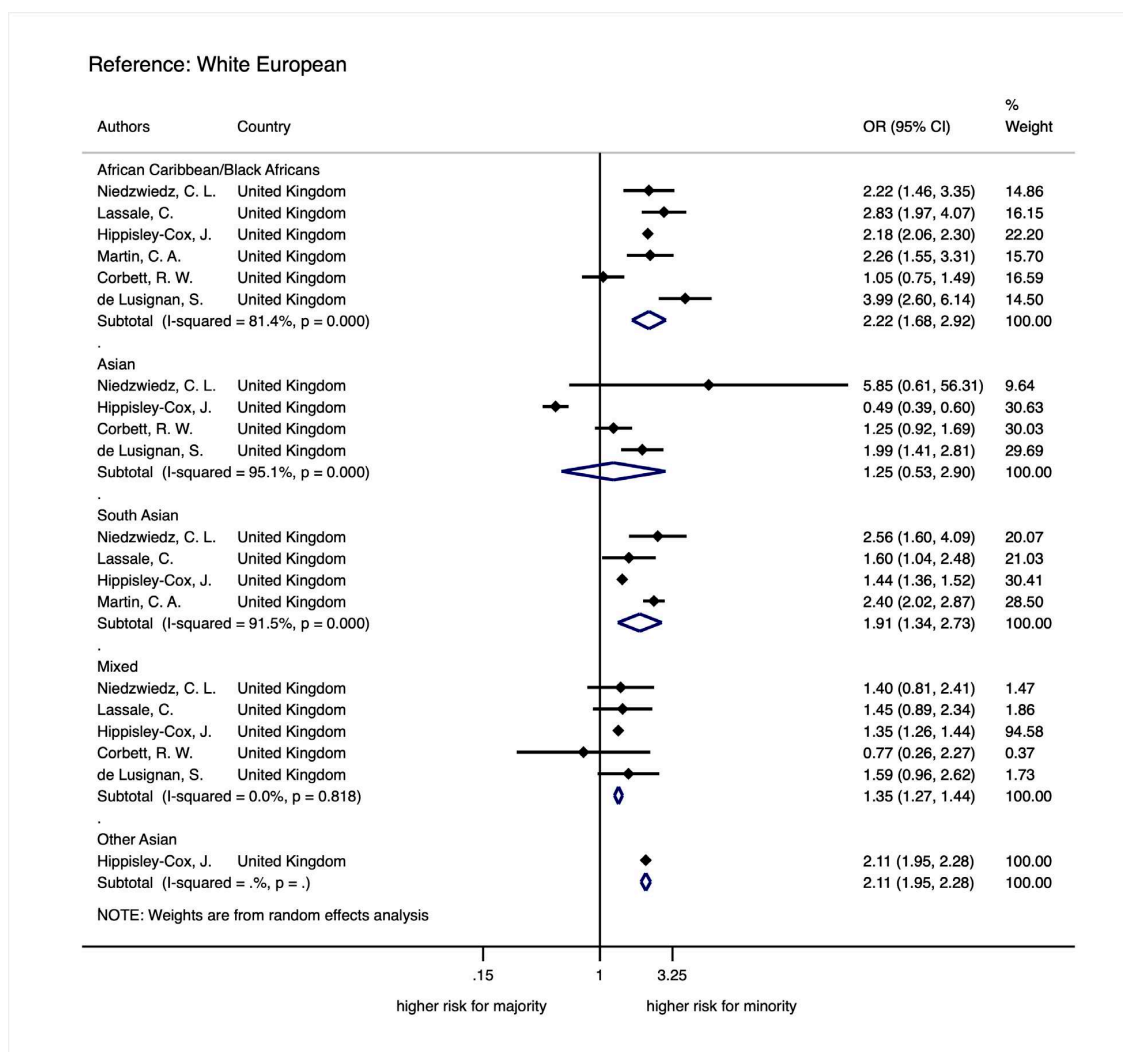

Appendix Figure 4: Individual studies with adjusted risk estimates for SARS-CoV-2 infection among the general population in Europe by ethnic minority group

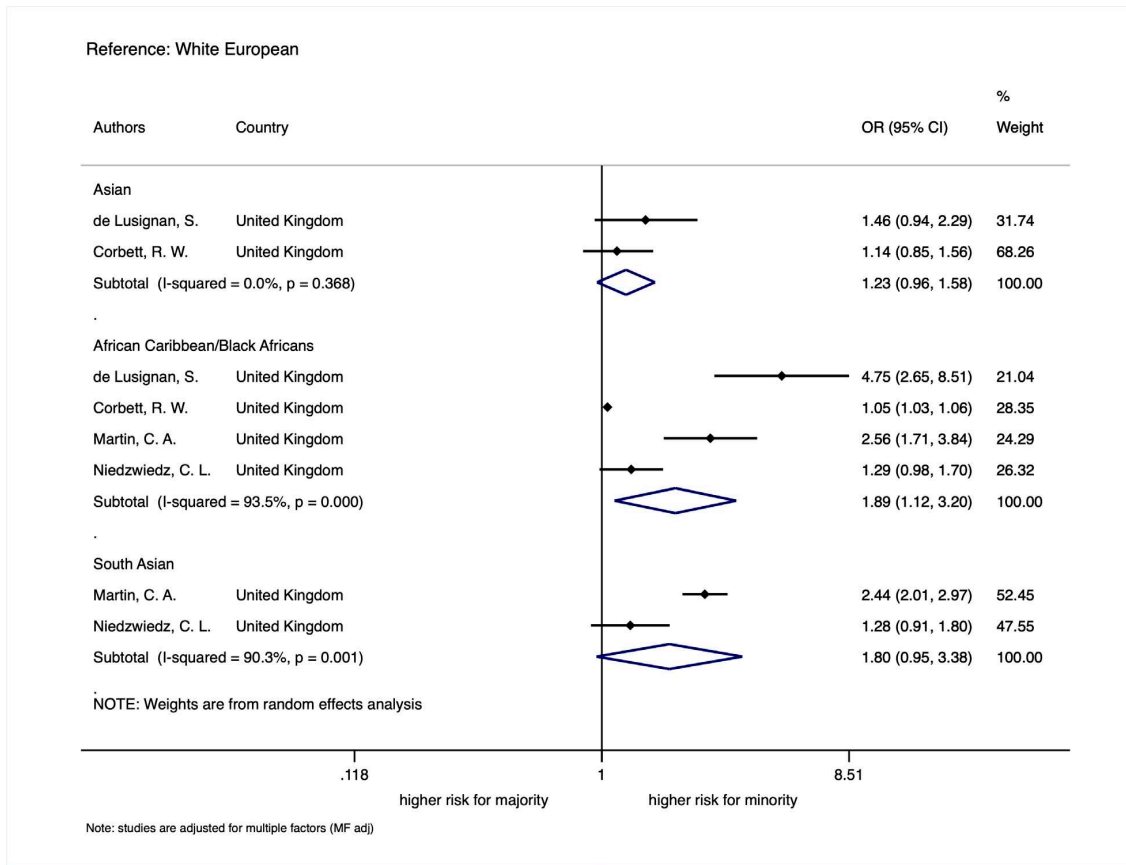

Appendix Figure 5: Individual studies with unadjusted risk estimates for hospitalization among infected individuals in the U.S. by ethnic minority group

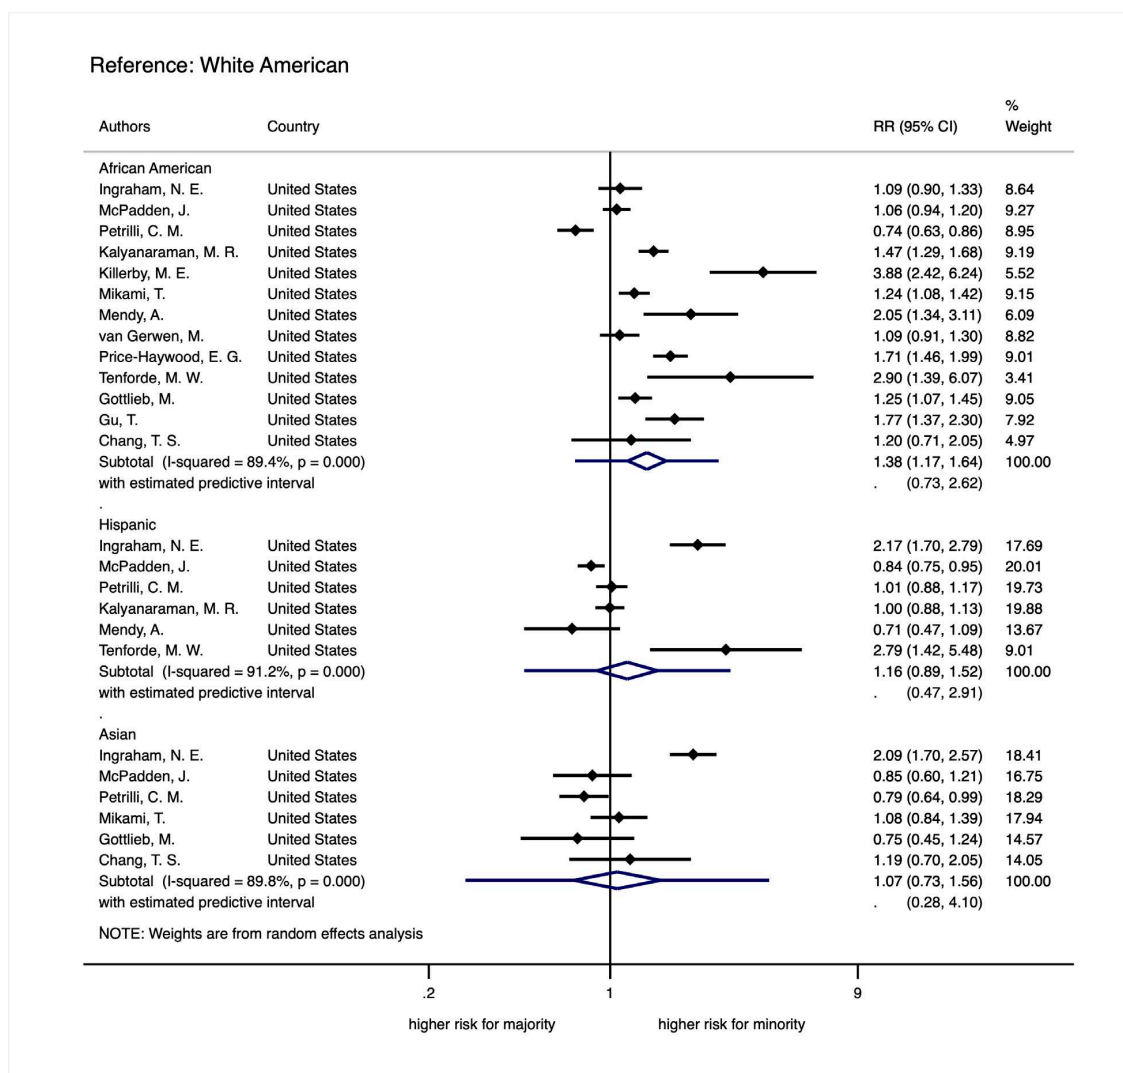

Appendix Figure 6: Individual studies with adjusted risk estimates for hospitalization among infected individuals in the U.S. by ethnic minority group

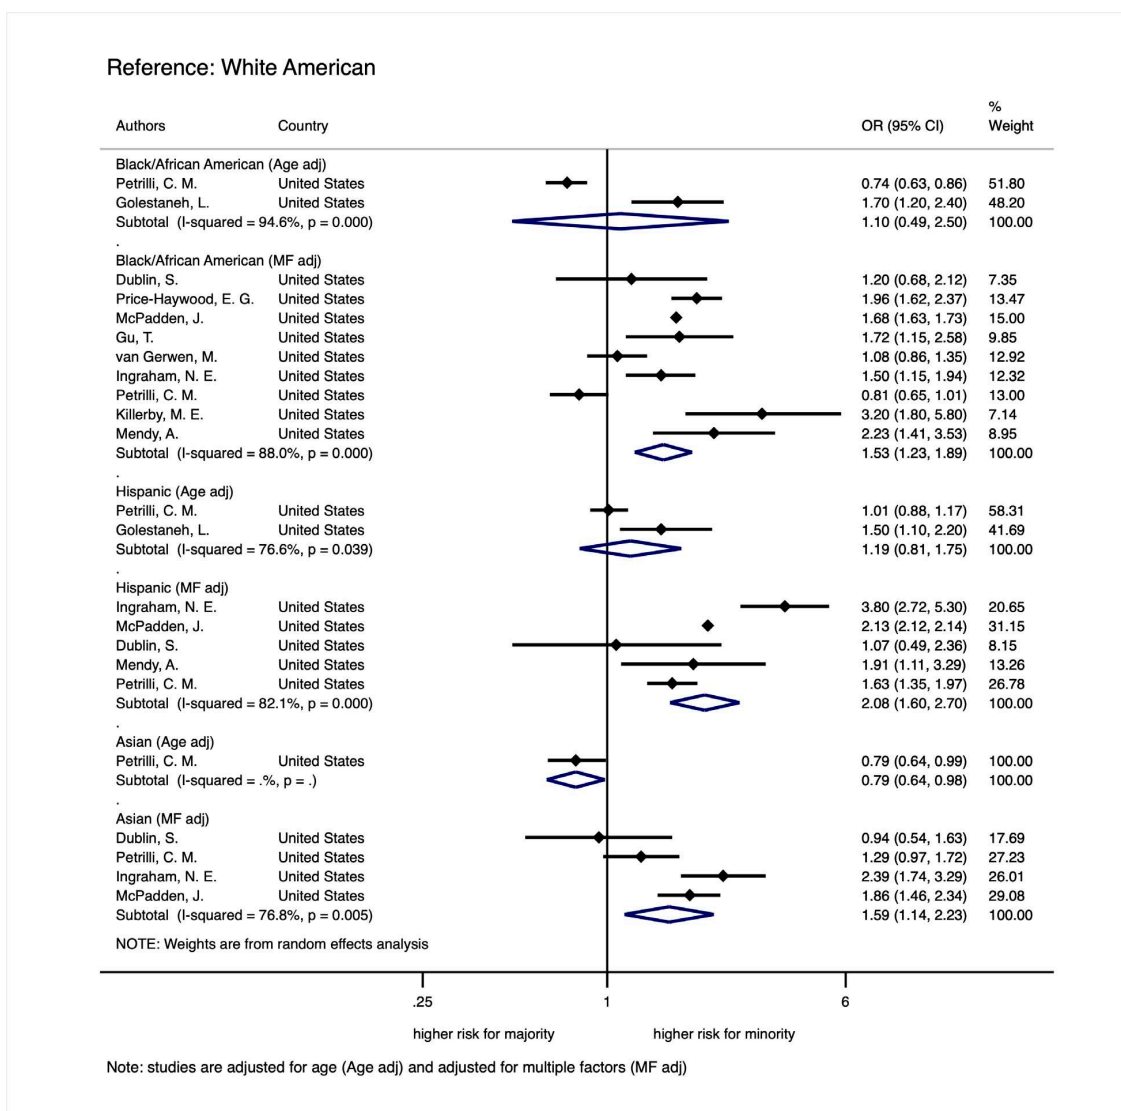

Appendix Figure 7: Individual studies with unadjusted risk estimates for severe disease among hospitalized COVID-19 patients in the U.S. by ethnic minority group

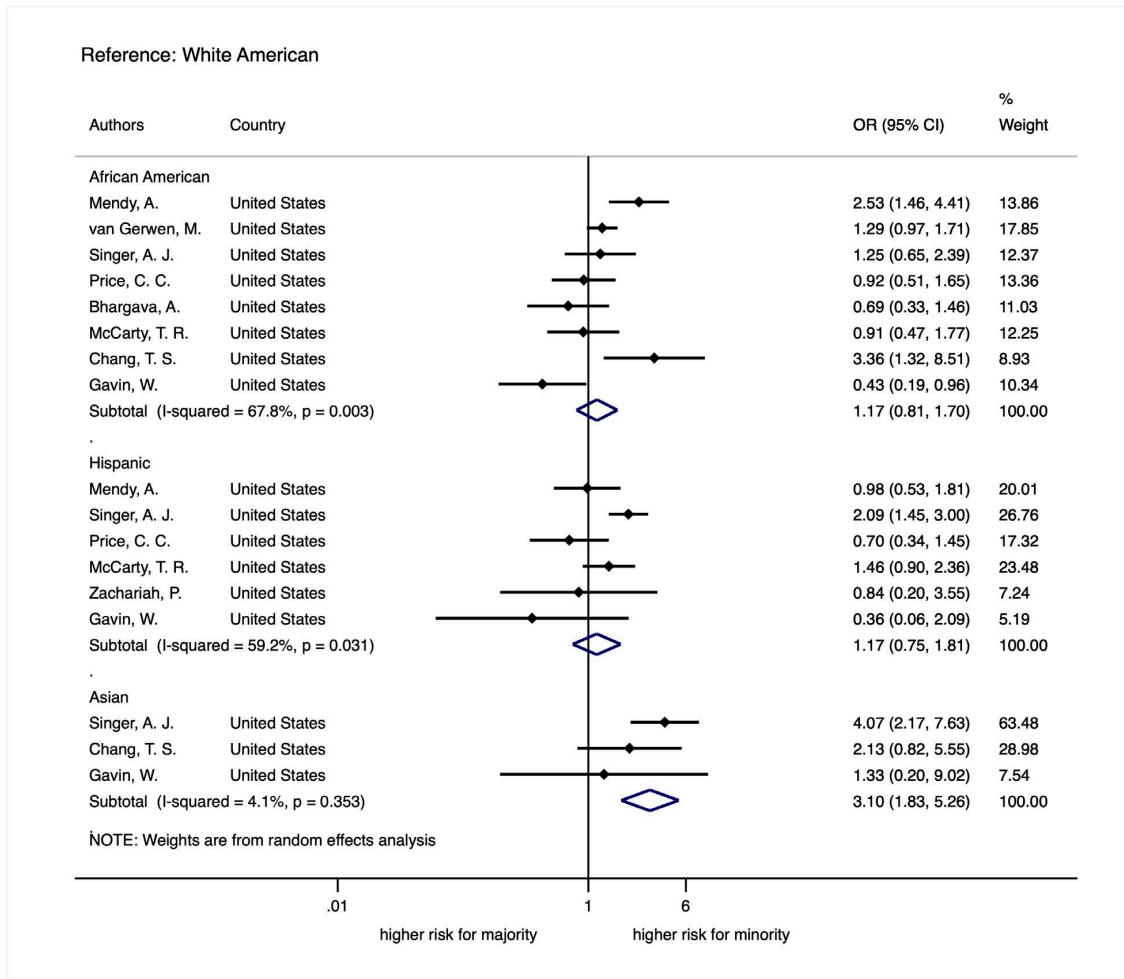

Appendix Figure 8: Individual studies with adjusted risk estimates for severe disease among hospitalized COVID-19 patients in the U.S. by ethnic minority group

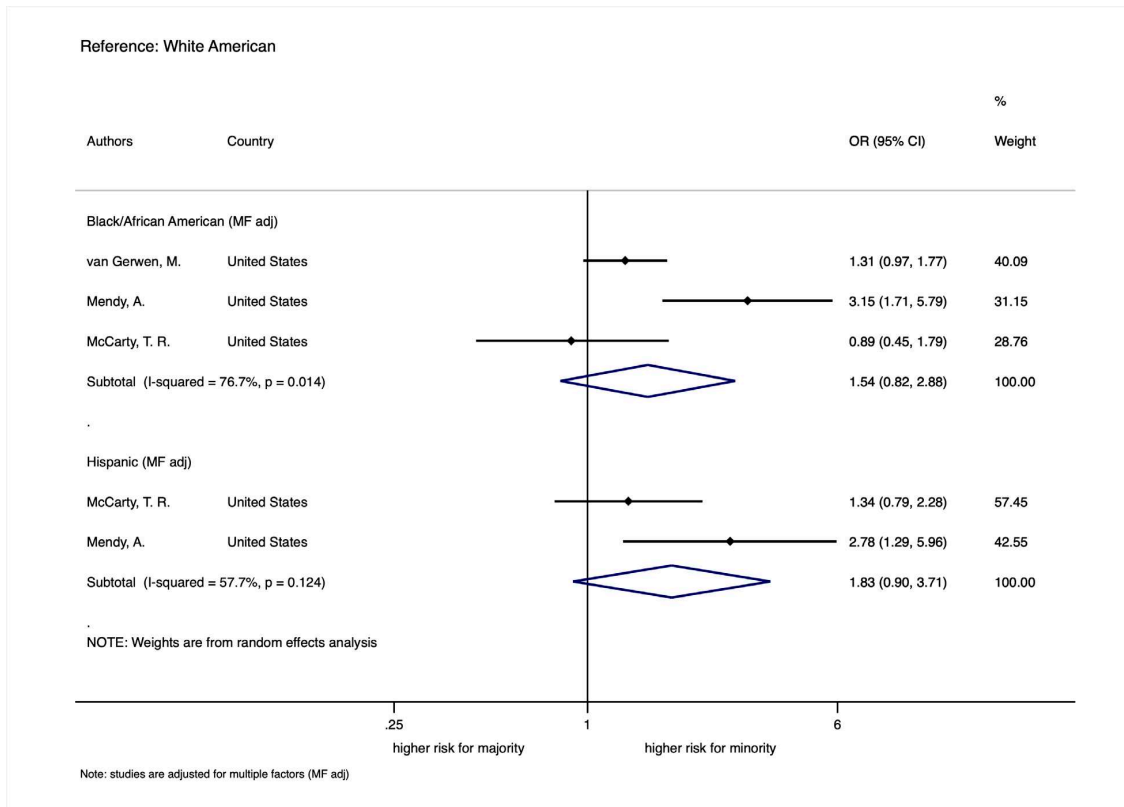

Appendix Figure 9: Individual studies with unadjusted risk estimates for ICU admission among hospitalized COVID-19 patients in the U.S. by ethnic minority group

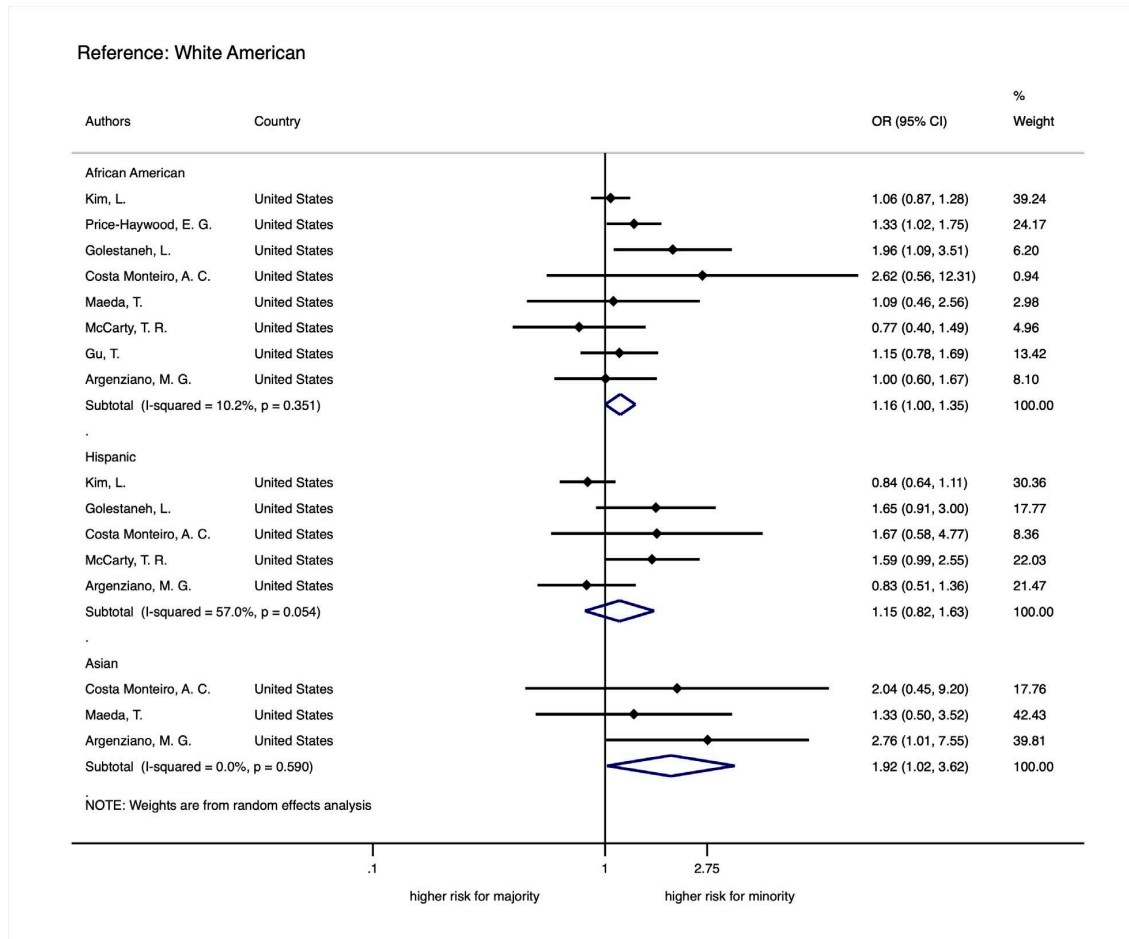



Appendix Figure 10: Individual studies with adjusted risk estimates for ICU admission among hospitalized COVID-19 patients in the U.S. by ethnic minority group

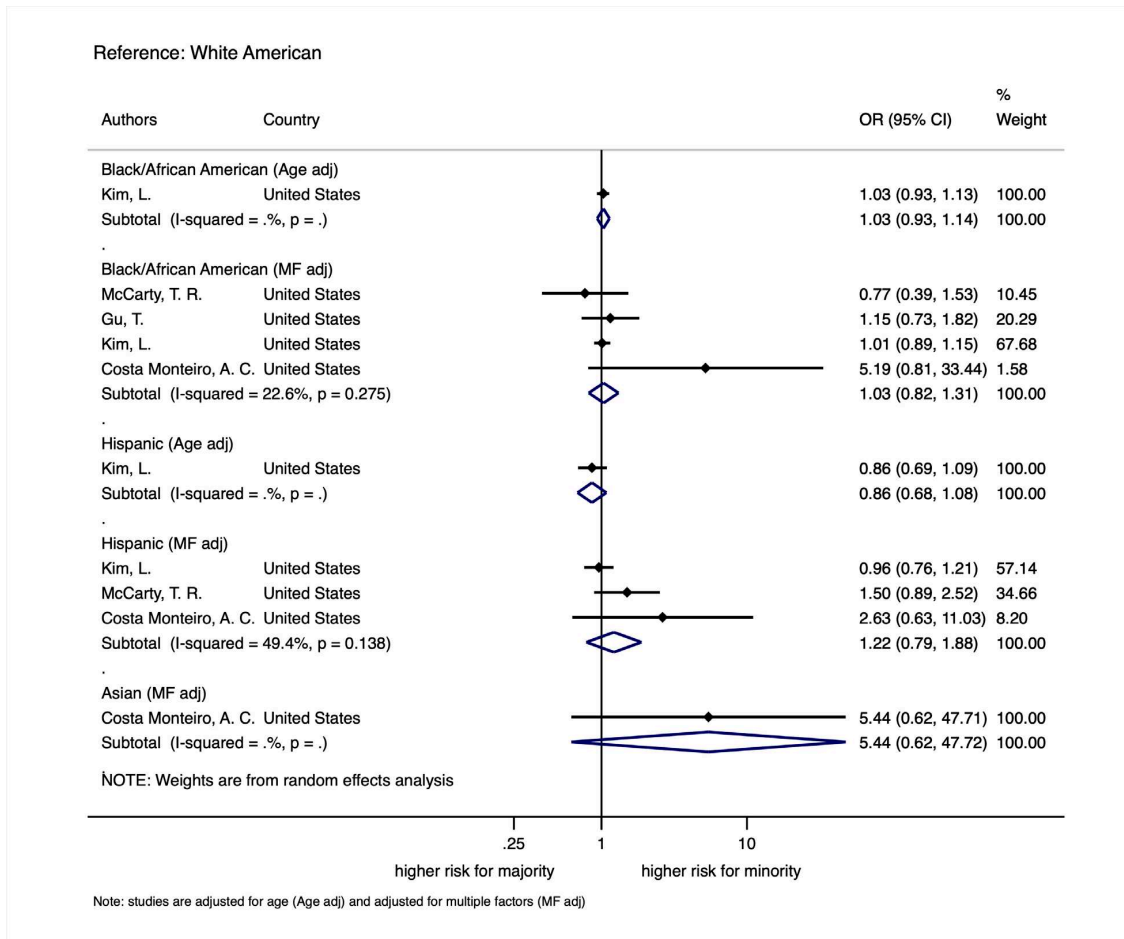

Appendix Figure 11: Individual studies with unadjusted risk estimates for death among hospitalized COVID-19 patients in the U.S. by ethnic minority group

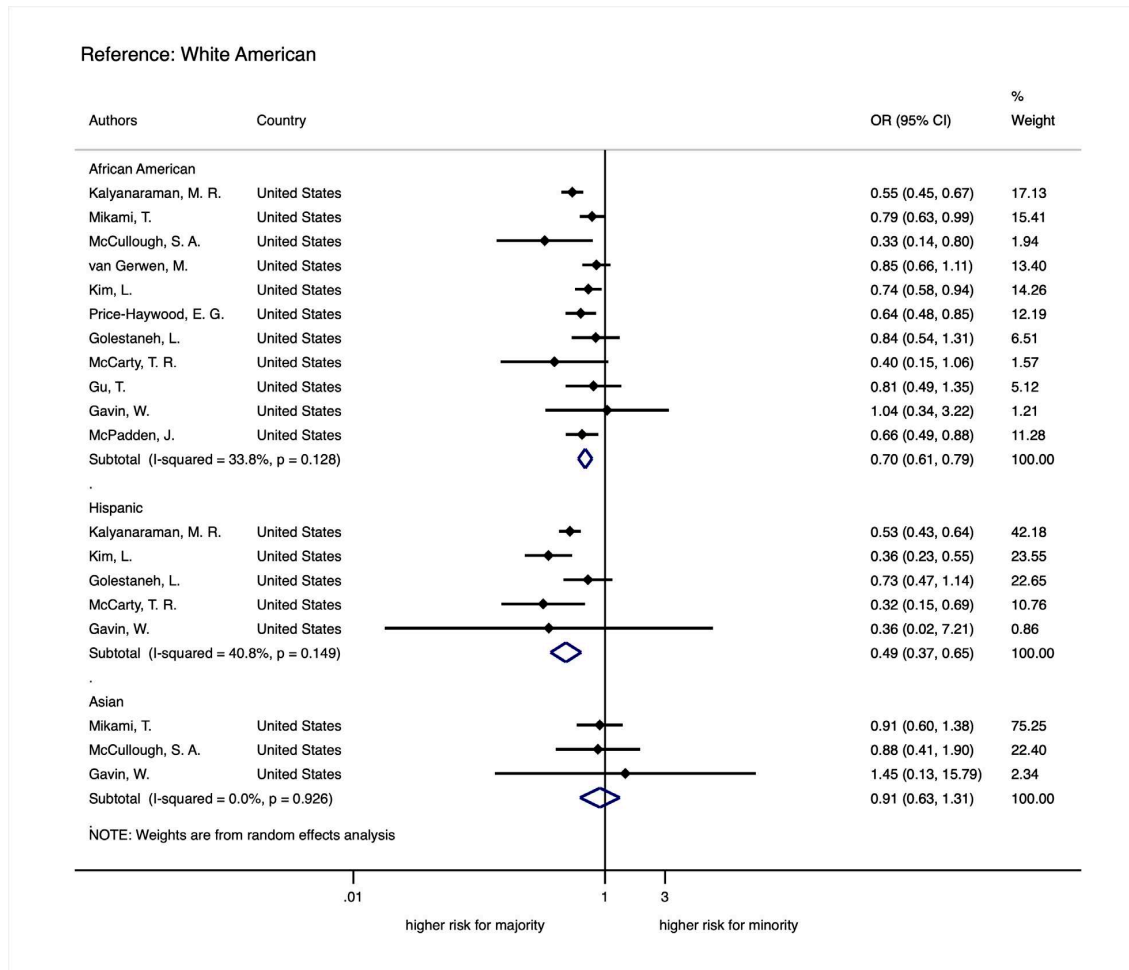

Appendix Figure 12: Individual studies with adjusted risk estimates for death among hospitalized COVID-19 patients in the U.S. by ethnic minority group

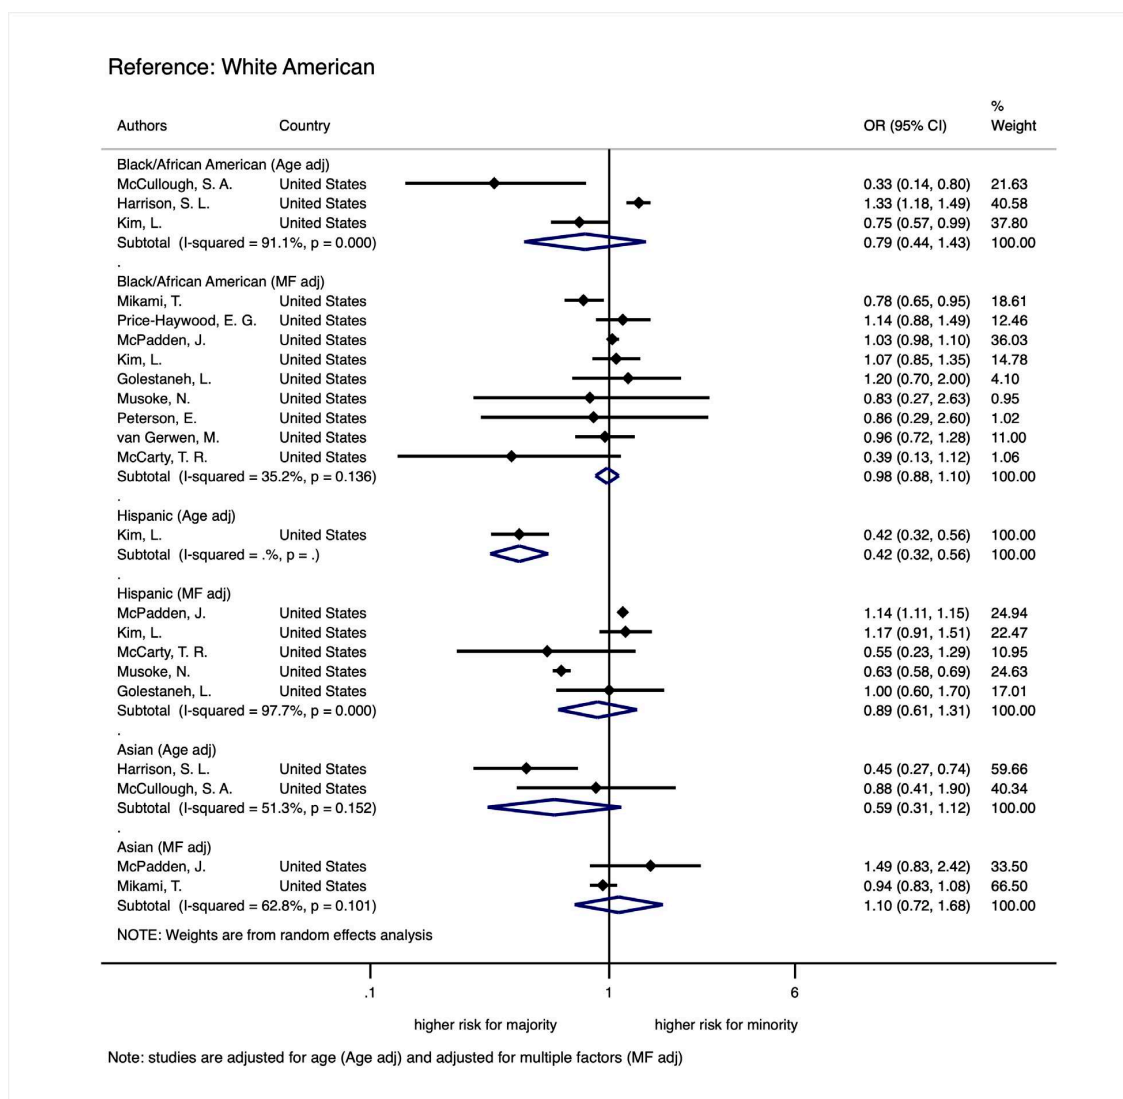

Appendix Figure 13: Individual studies with unadjusted risk estimates for death among hospitalized COVID-19 patients in Europe by ethnic minority group

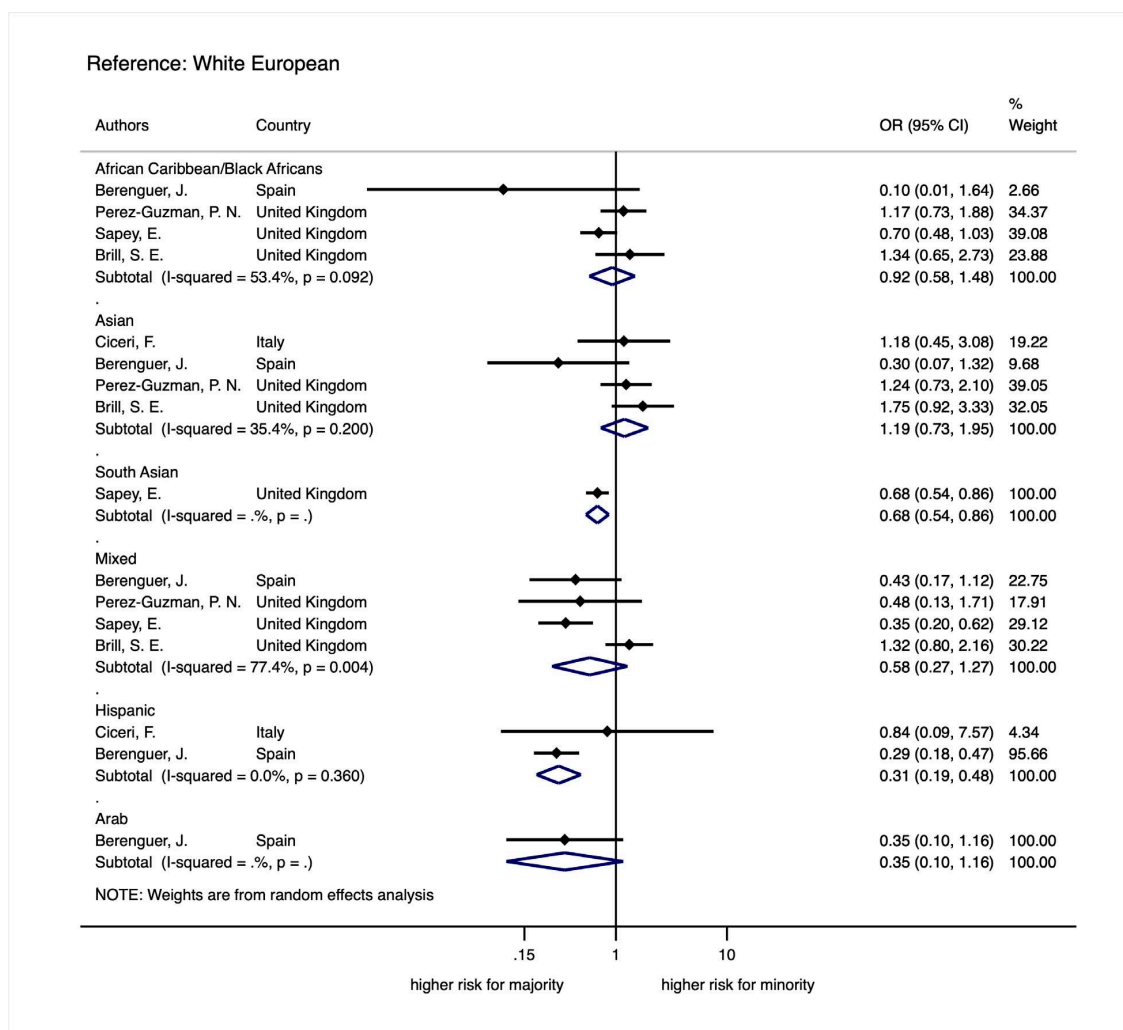

Appendix Figure 14: Individual studies with unadjusted risk estimates for death among hospitalized COVID-19 patients in Brazil by ethnic minority group

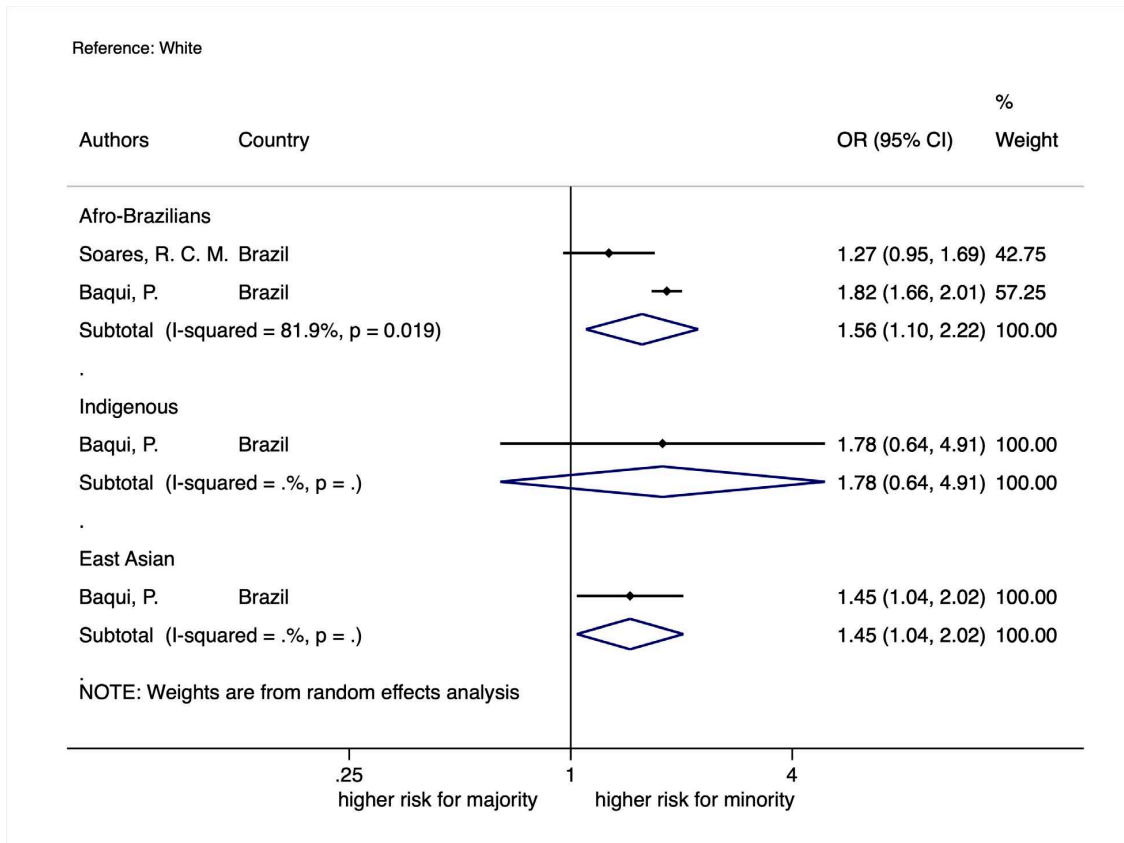

Supplement: bmjgh-2021-007433supp001.pdf [file bmjgh-2021-007433supp001.pdf]
